# Supplementary material
Source: publisher site journal article supplement (https://www.degruyterbrill.com/publication/isbn/9783805912594/downloadAsset/9783805912594_Inhaltsverzeichnis.pdf)
Supplement: Supplementary file 1 [file 9783805912594_Inhaltsverzeichnis.pdf]

# Inhaltsübersicht

|                                                     | Seite <sup>*</sup> |
|-----------------------------------------------------|--------------------|
| Buch 2 · Recht der Schuldverhältnisse               |                    |
| Abschnitt 8 · Einzelne Schuldverhältnisse           |                    |
| Titel 27 · Unerlaubte Handlungen §§ 839, 839a _____ | 1                  |
| Sachregister _____                                  | 457                |

---

<sup>\*</sup> Zitiert wird nicht nach Seiten, sondern nach Paragraph bzw Artikel und Randnummer; siehe dazu auch „Zitierweise“.
